# Supplementary material for: Rituximab impedes natural killer cell function in Chronic Fatigue Syndrome/Myalgic Encephalomyelitis patients: A pilot in vitro investigation
Source: PubMed Central journal article supplement (PMC5870391; doi:10.1186/s40360-018-0203-8), 2018-03-27
Supplement: 40360_2018_203_MOESM1_ESM.pdf [file 40360_2018_203_MOESM1_ESM.pdf]

**Supplementary Figure 1:**

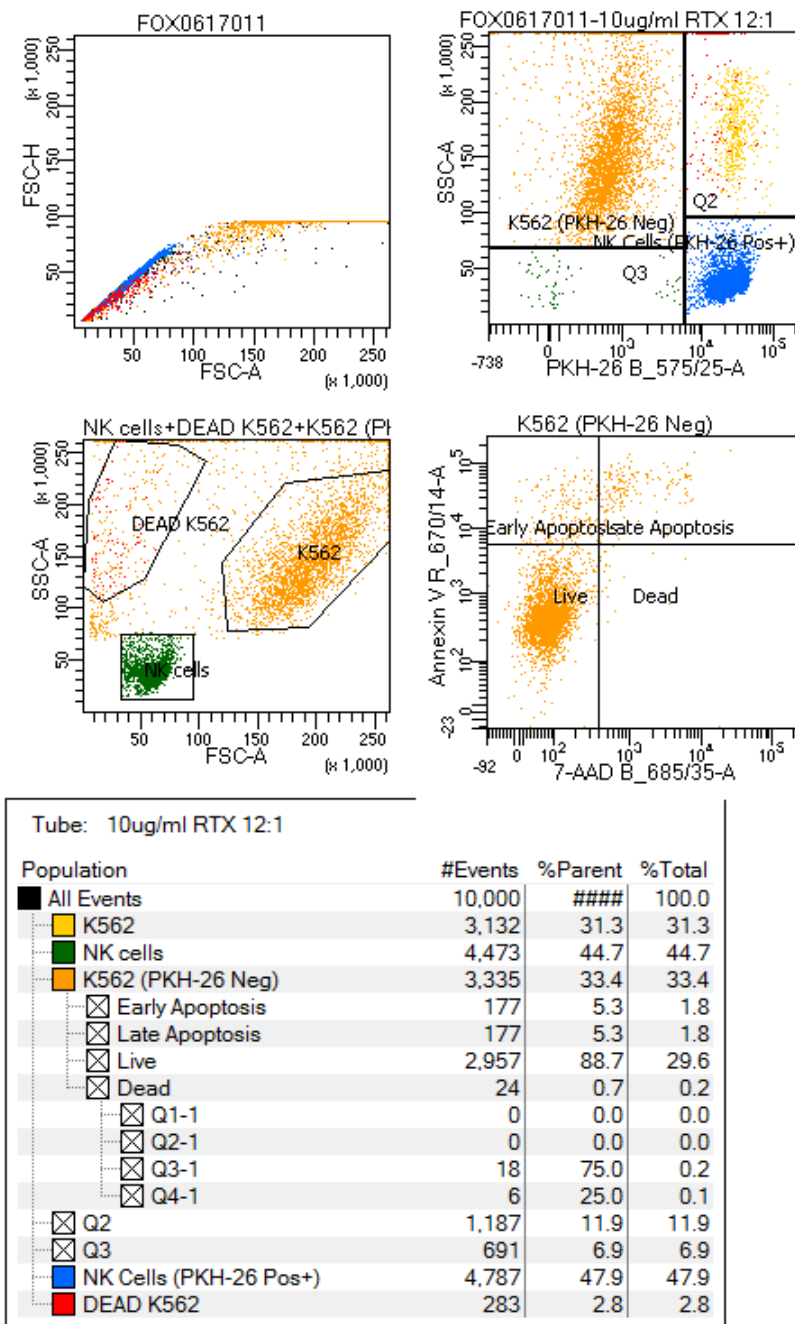

**Supplementary Figure 1: Representative flow cytometric plot of NK cell cytotoxic activity.** PKH-26 was used to gate NK cells. PKH-26 negative cells were identified as K562 cells and used to determine apoptosis. Annexin V was used to determine events undergoing apoptosis and 7-AAD was used to determine cells undergoing late apoptosis and cells that were dead.

**Supplementary Figure 2:**

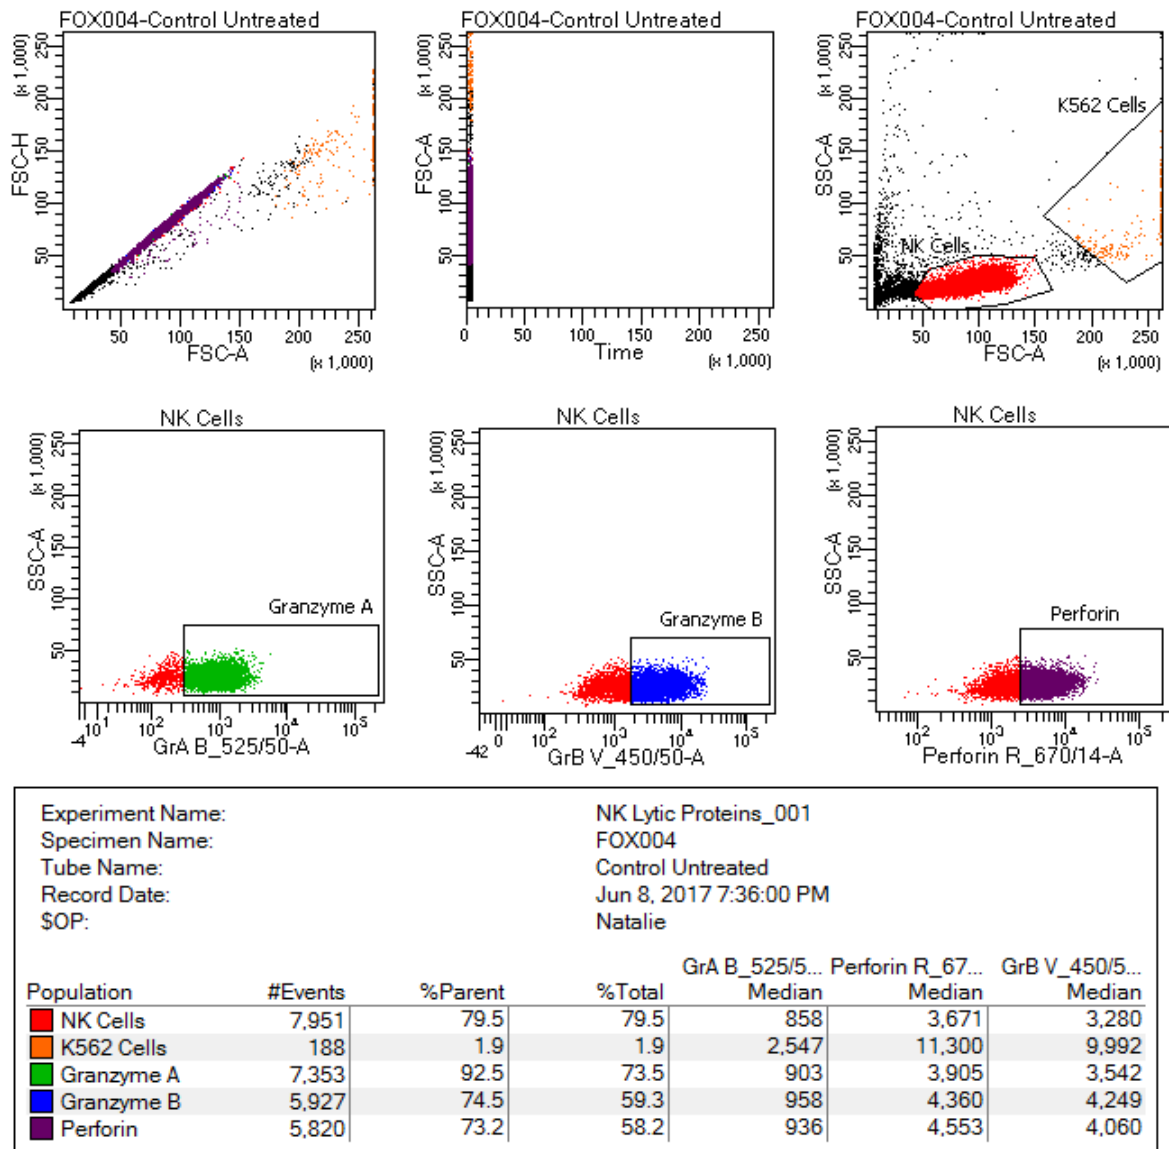

**Supplementary Figure 2: Representative flow cytometric plot of intracellular staining analysis of lytic proteins.** NK cells were isolated and were used if isolation purity was  $\geq 95\%$ . NK cells were selectively gated on using flow cytometry and isotype controls were used to determine the positive population for Granzyme A and Granzyme B expression.

### Supplementary Figure 3:

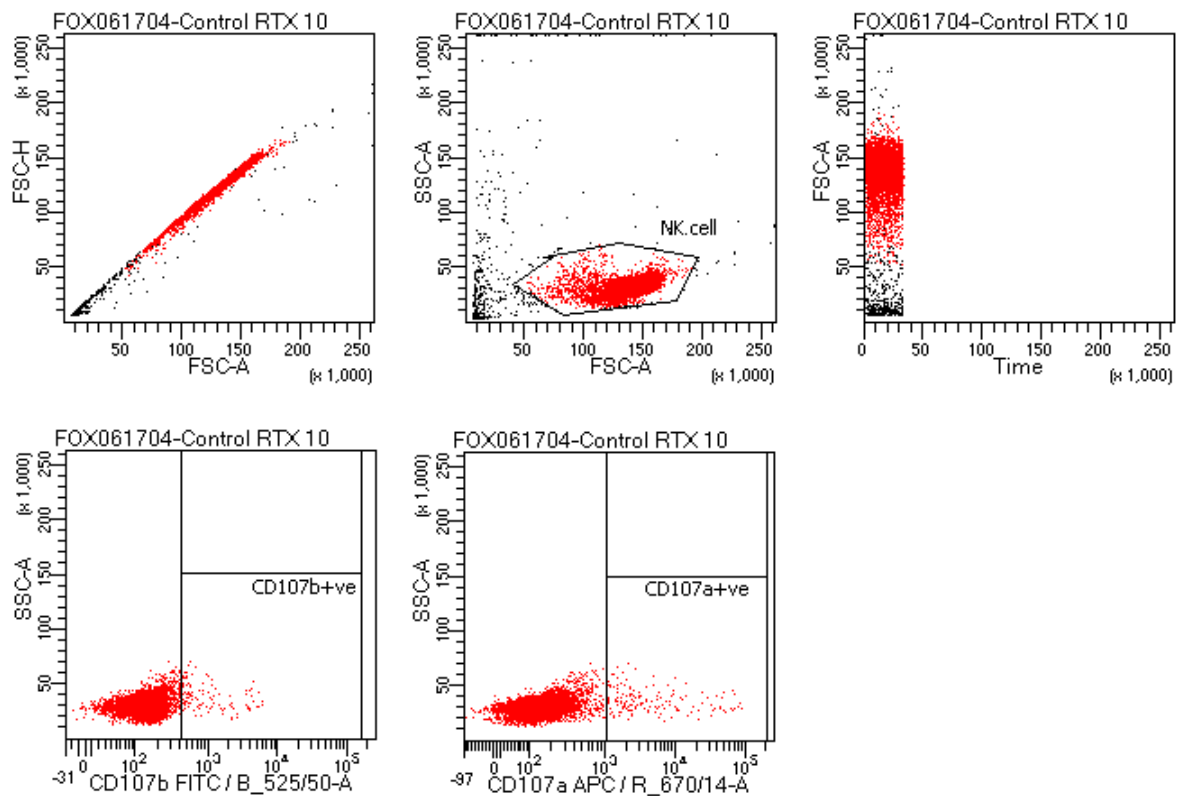

| Experiment Name: | NK Cell Degranulation_001 |         |        |                              |                             |
|------------------|---------------------------|---------|--------|------------------------------|-----------------------------|
| Specimen Name:   | FOX061704                 |         |        |                              |                             |
| Tube Name:       | Control RTX 10            |         |        |                              |                             |
| Record Date:     | Jun 8, 2017 6:10:51 PM    |         |        |                              |                             |
| SOP:             | Natalie                   |         |        |                              |                             |
| Population       | #Events                   | %Parent | %Total | CD107b FITC / B...<br>Median | CD107a APC / R...<br>Median |
| All Events       | 10,130                    | ####    | 100.0  | 131                          | 169                         |
| NK cell          | 9,648                     | 95.2    | 95.2   | 131                          | 167                         |
| CD107b+ve        | 112                       | 1.2     | 1.1    | 733                          | 5,064                       |
| CD107a+ve        | 148                       | 1.5     | 1.5    | 511                          | 2,925                       |

| Tube: Control RTX 10 |         |         |        |
|----------------------|---------|---------|--------|
| Population           | #Events | %Parent | %Total |
| All Events           | 10,130  | ####    | 100.0  |
| NK cell              | 9,648   | 95.2    | 95.2   |
| CD107b+ve            | 112     | 1.2     | 1.1    |
| CD107a+ve            | 148     | 1.5     | 1.5    |

**Supplementary Figure 3: Representative flow cytometric plots for degranulation markers.** NK cells were isolated and were used if isolation purity was  $\geq 95\%$ . NK cells were gated and selected using flow cytometry to determine CD107a and CD107b expression. Isotype controls were used to determine the positive population.
